# Supplementary material for: Association between Genotype, Presentation, and Outcome in Childhood Idiopathic and Hereditary Pulmonary Arterial Hypertension
Source: MDPI journal article supplement (doi:10.3390/jcm11247331), 2022-12-09

**Figure S1.** Clinical characteristics and hemodynamics in subgroups: Comparisons between patients with pathogenic and VUS in BMPR2 variants or pathogenic/likely pathogenic variants in other PAH related genes, and no pathogenic variants in age at diagnosis, WHO FC, BNP level, RAP, PVRI and cardiac index (CI). (n=62 in no variants, n=67 in BMPR2 or pathogenic/likely pathogenic variants in other PAH related genes).

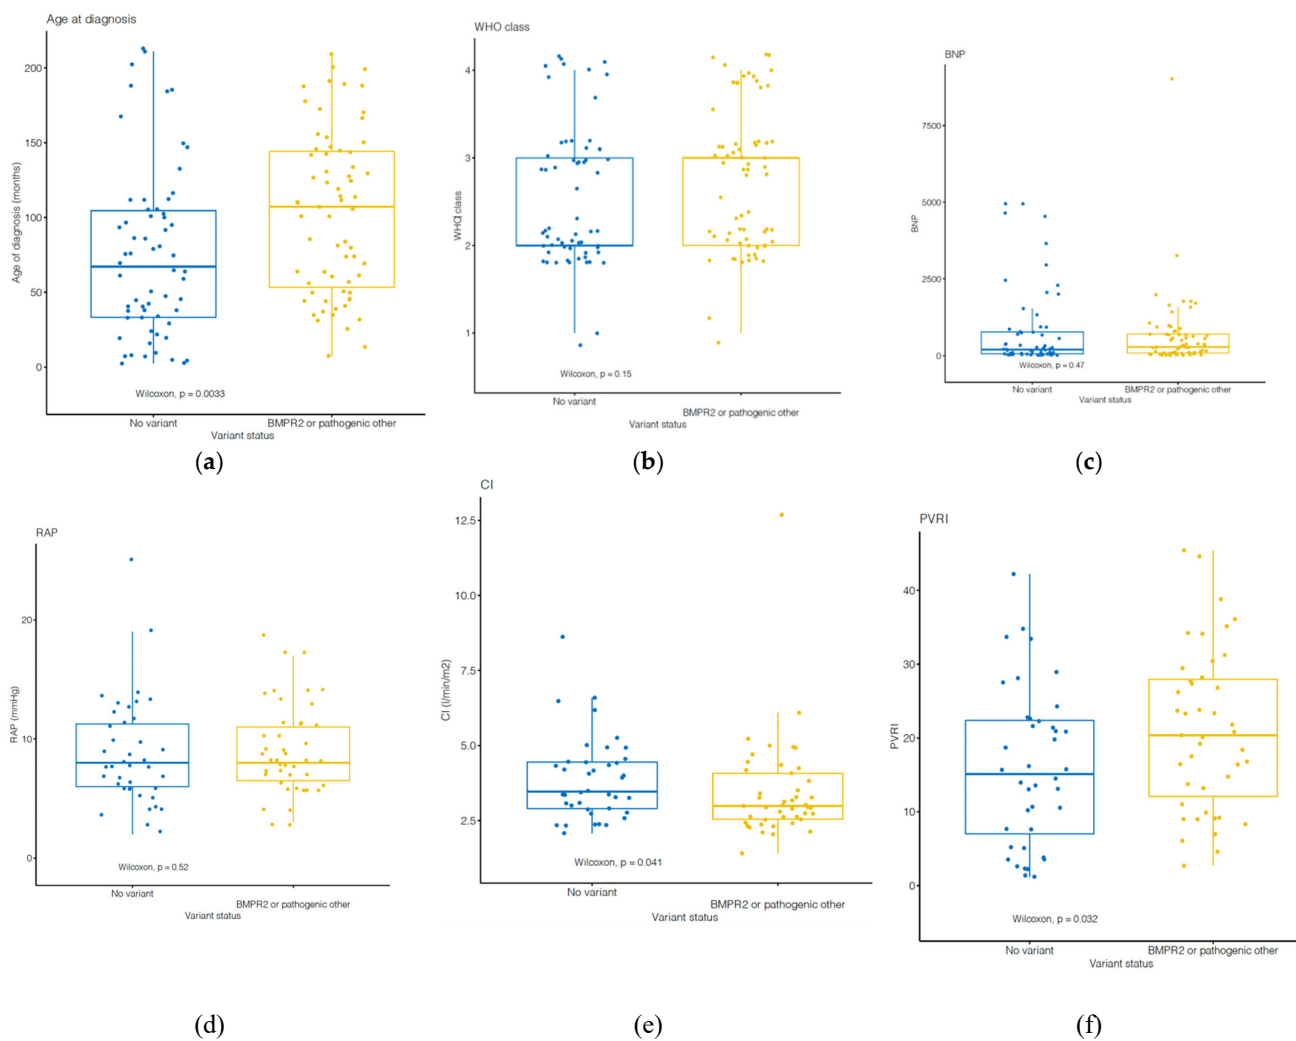

**Figure S2.** Kaplan-Meier survival analysis in patients with VUS BMPR2 and pathogenic BMPR2.

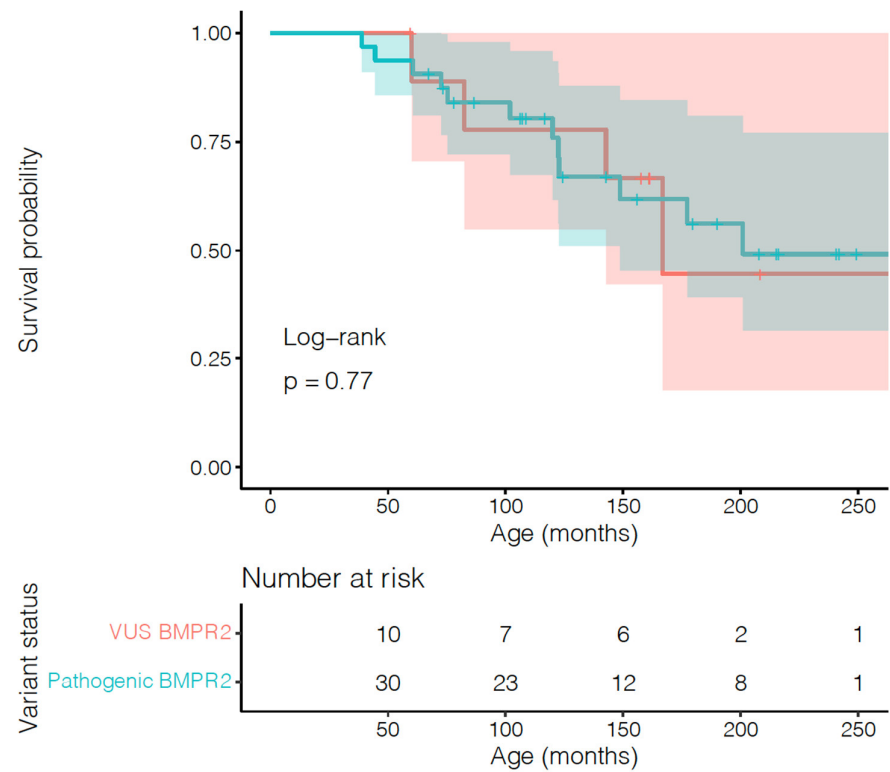

Supplement: s1 [file s1]
